# Supplementary material for: Allosteric inhibition of hypoxia inducible factor-2 with small molecules
Source: Springer Nature journal article supplement (doi:10.1038/nchembio.1185), 2013-02-24
Supplement: 41589_2013_BFnchembio1185_MOESM3_ESM.mol [file 41589_2013_BFnchembio1185_MOESM3_ESM.mol]

  ChemDraw02051309252D

 21 23  0  0  0  0  0  0  0  0999 V2000
   -1.8763    0.6181    0.0000 C   0  0  0  0  0  0  0  0  0  0  0  0
   -1.8763   -0.2069    0.0000 C   0  0  0  0  0  0  0  0  0  0  0  0
   -1.1619   -0.6194    0.0000 C   0  0  0  0  0  0  0  0  0  0  0  0
   -0.4474   -0.2069    0.0000 C   0  0  0  0  0  0  0  0  0  0  0  0
   -0.4474    0.6181    0.0000 C   0  0  0  0  0  0  0  0  0  0  0  0
   -1.1619    1.0306    0.0000 C   0  0  0  0  0  0  0  0  0  0  0  0
    0.2671   -0.6194    0.0000 N   0  0  0  0  0  0  0  0  0  0  0  0
    0.9815   -0.2069    0.0000 C   0  0  0  0  0  0  0  0  0  0  0  0
    1.6960   -0.6194    0.0000 C   0  0  0  0  0  0  0  0  0  0  0  0
    2.4105   -0.2069    0.0000 C   0  0  0  0  0  0  0  0  0  0  0  0
    2.4105    0.6181    0.0000 C   0  0  0  0  0  0  0  0  0  0  0  0
    1.6960    1.0306    0.0000 C   0  0  0  0  0  0  0  0  0  0  0  0
    0.9815    0.6181    0.0000 C   0  0  0  0  0  0  0  0  0  0  0  0
   -2.6732    0.8316    0.0000 N   0  0  0  0  0  0  0  0  0  0  0  0
   -3.1226    0.1397    0.0000 O   0  0  0  0  0  0  0  0  0  0  0  0
   -2.6034   -0.5015    0.0000 N   0  0  0  0  0  0  0  0  0  0  0  0
    1.6960    1.8556    0.0000 Cl  0  0  0  0  0  0  0  0  0  0  0  0
    3.1226   -0.6181    0.0000 F   0  0  0  0  0  0  0  0  0  0  0  0
   -1.1619   -1.4444    0.0000 N   0  3  0  0  0  0  0  0  0  0  0  0
   -1.8739   -1.8556    0.0000 O   0  0  0  0  0  0  0  0  0  0  0  0
   -0.4498   -1.8556    0.0000 O   0  5  0  0  0  0  0  0  0  0  0  0
  1  2  1  0      
  2  3  1  0      
  3  4  2  0      
  4  5  1  0      
  5  6  2  0      
  6  1  1  0      
  4  7  1  0      
  7  8  1  0      
  8  9  2  0      
  9 10  1  0      
 10 11  2  0      
 11 12  1  0      
 12 13  2  0      
 13  8  1  0      
  1 14  2  0      
 14 15  1  0      
 15 16  1  0      
 16  2  2  0      
  3 19  1  0      
 12 17  1  0      
 10 18  1  0      
 19 20  2  0      
 19 21  1  0      
M  CHG  2  19   1  21  -1
M  END
